# Supplementary material for: Rectal Cancer: 20% Risk Reduction Thanks to Dietary Fibre Intake. Systematic Review and Meta-Analysis
Source: MDPI journal article supplement (doi:10.3390/nu11071579), 2019-07-12
Supplement: s1 [file s1]

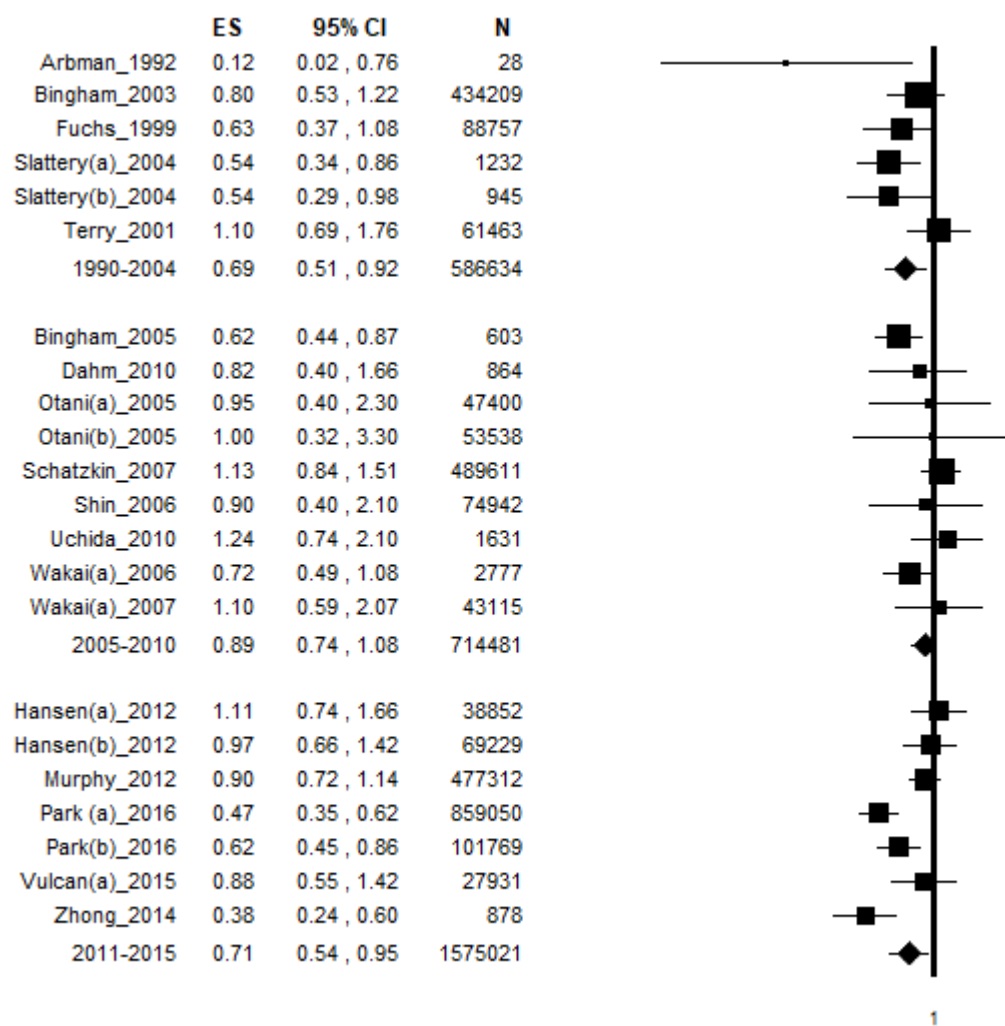

Figure S2 Forest plot of the moderator analysis for year of publication in prevention of rectal cancer
