# Supplementary material for: Rectal Cancer: 20% Risk Reduction Thanks to Dietary Fibre Intake. Systematic Review and Meta-Analysis
Source: Nutrients. 2019 Jul 12;11(7):1579. doi: 10.3390/nu11071579 (PMC6683071; doi:10.3390/nu11071579)
Supplement: Supplementary file 1 [file nutrients-11-01579-s001.zip]

Archive with 5 entries (5 files):
- Figure S1a.pdf
- Figure S1b.pdf
- Figure S2.pdf
- Table S1.docx
- Table S2.docx
