# Supplementary figures and images for: Rectal Cancer: 20% Risk Reduction Thanks to Dietary Fibre Intake. Systematic Review and Meta-Analysis
Source: MDPI journal article supplement (doi:10.3390/nu11071579), 2019-07-12

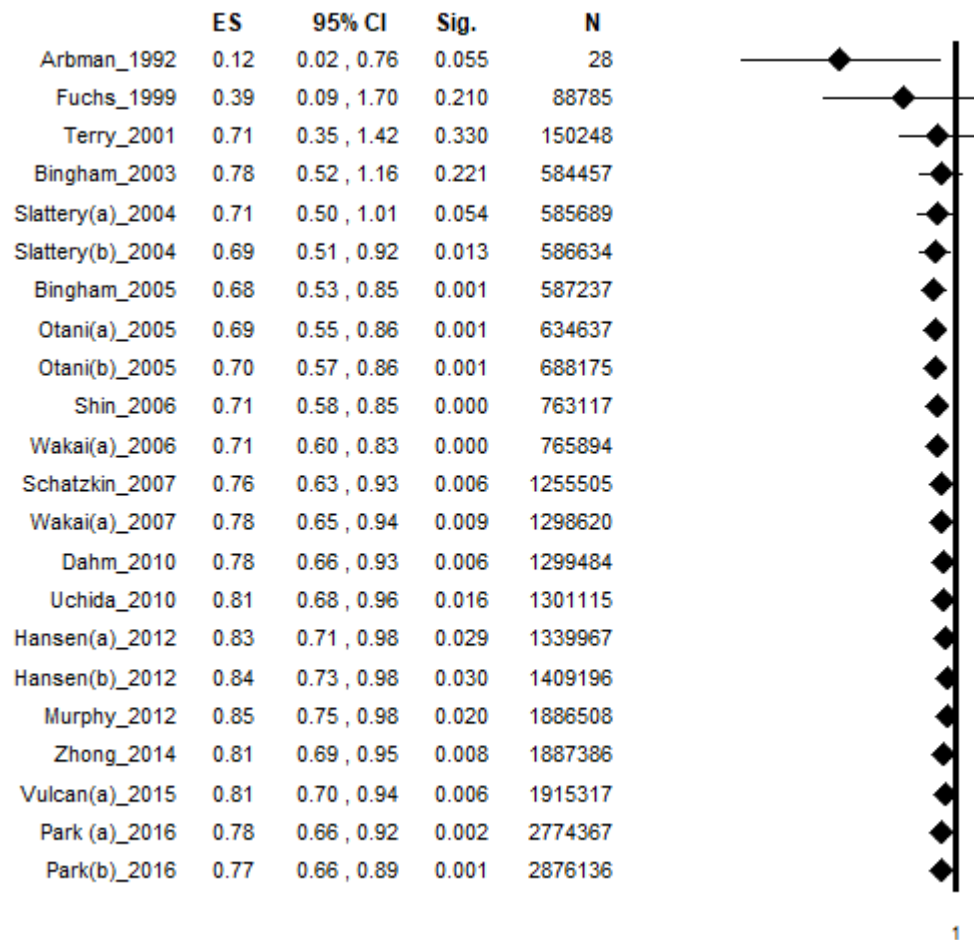

Figure S1a Forest plot of the cumulative analysis for year of publication

Supplement: s1 [file s1]
